# Supplementary material for: Temporal Splicing Switches in Elements of the TNF-Pathway Identified by Computational Analysis of Transcriptome Data for Human Cell Lines
Source: MDPI journal article supplement (doi:10.3390/ijms20051182), 2019-03-08

# LCL-HO

**A**

## Isoform Usage in NME2 (timepoint.24h vs timepoint.33h)

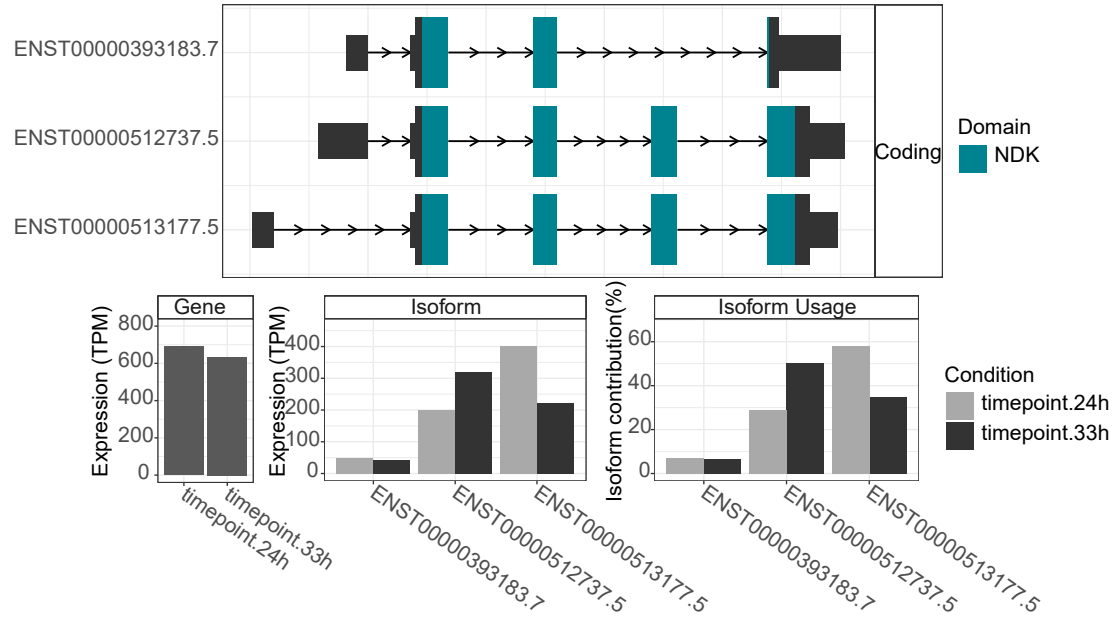

**B**

## Isoform Usage in JCHAIN (timepoint.24h vs timepoint.33h)

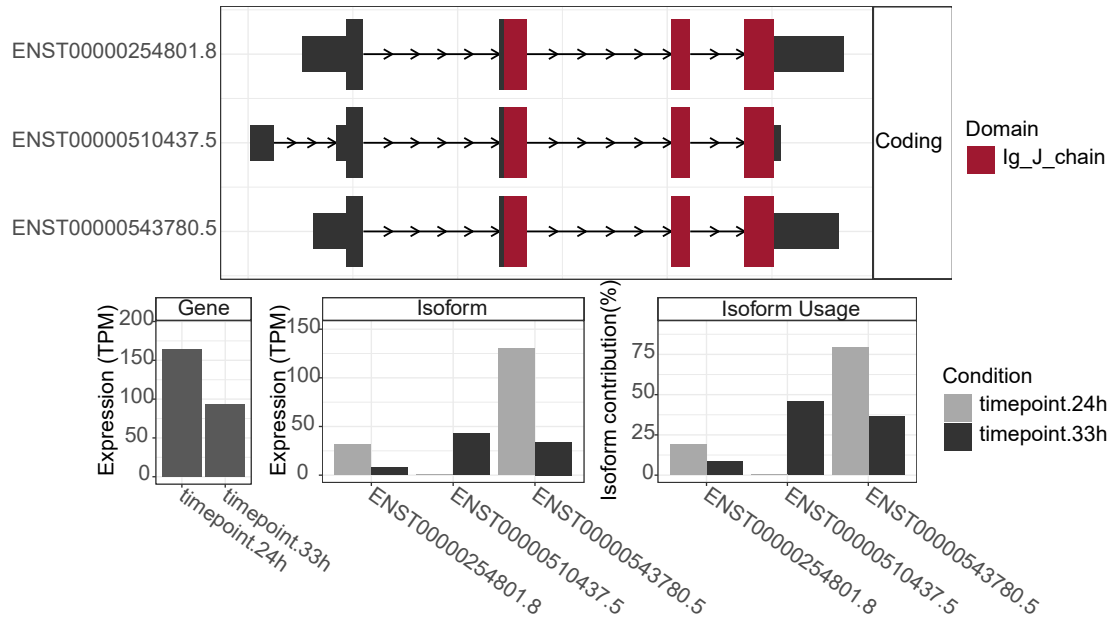

Supplement: s1 [file s1]
