# Supplementary material for: Temporal Splicing Switches in Elements of the TNF-Pathway Identified by Computational Analysis of Transcriptome Data for Human Cell Lines
Source: MDPI journal article supplement (doi:10.3390/ijms20051182), 2019-03-08

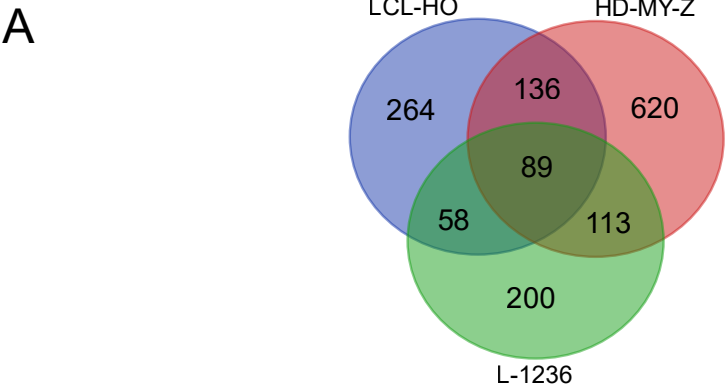

**B** Switching Genes Intersect, Reactome Pathways

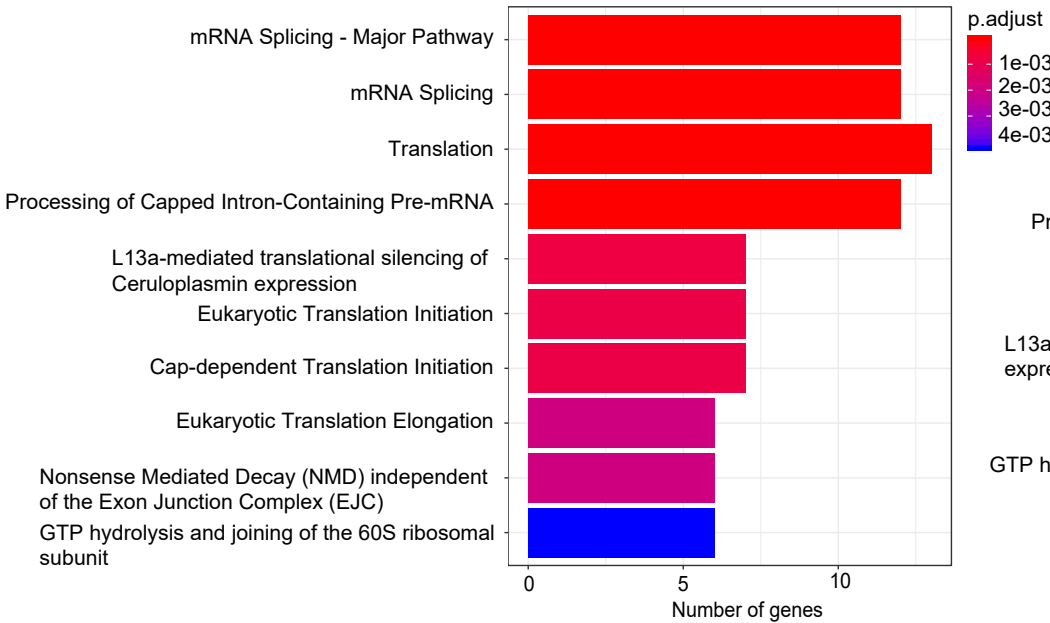

**C** Switching Genes Intersect, Disease Ontology Pathways

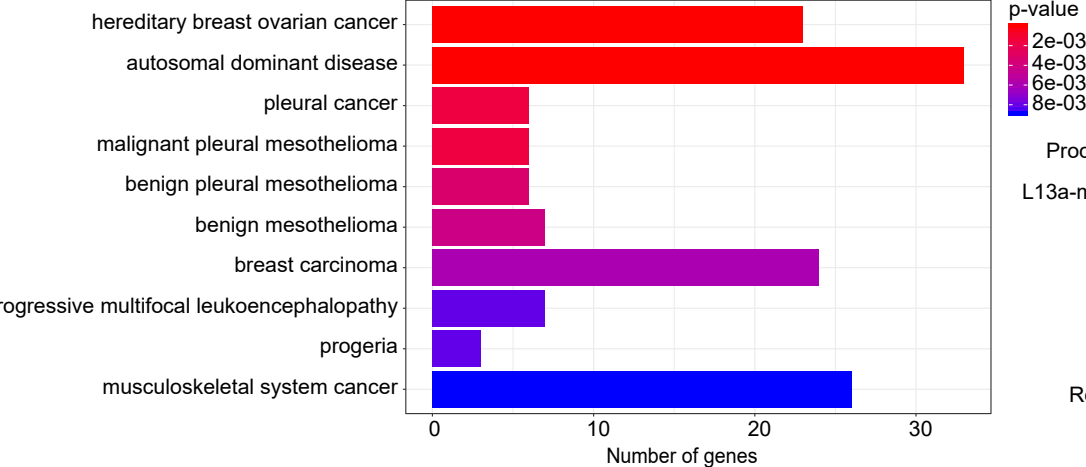

**D**

LCL-HO, Reactome Pathways

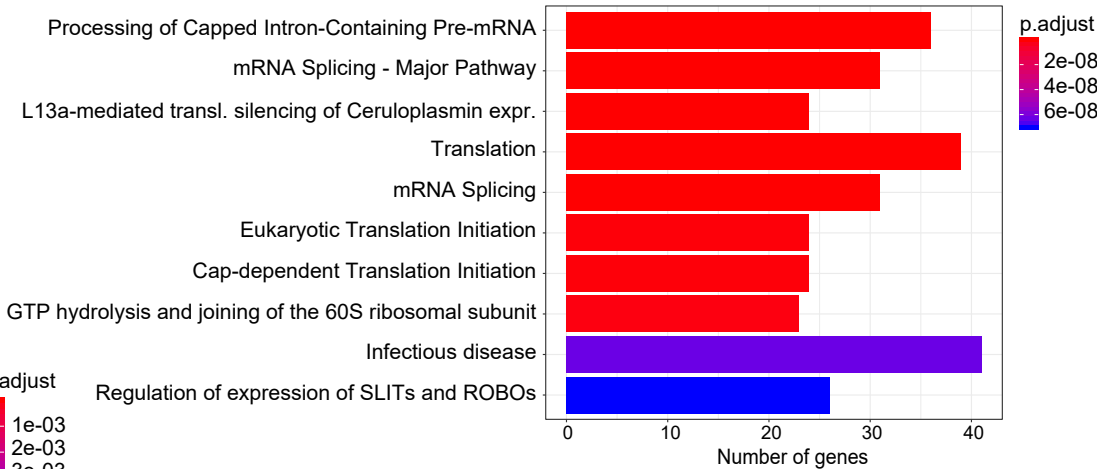

HD-MY-Z, Reactome Pathways

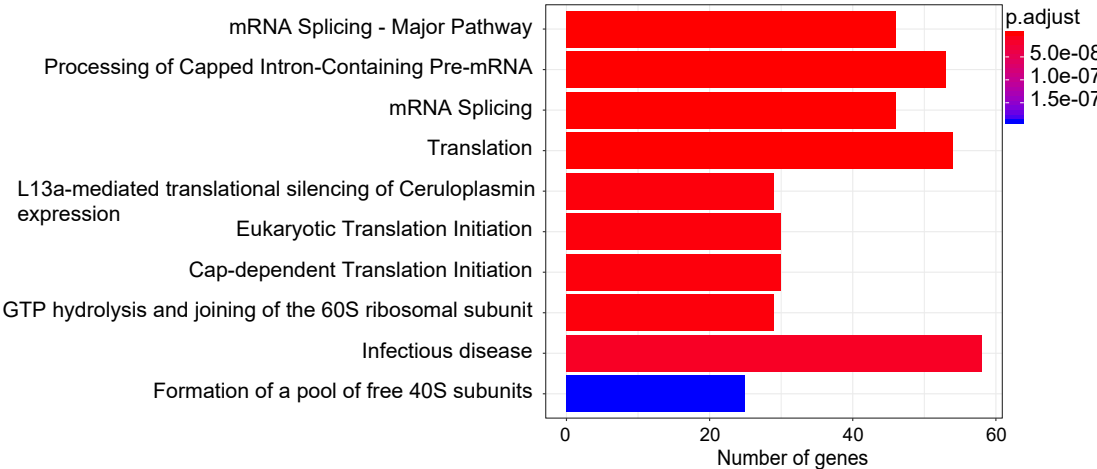

L-1236, Reactome Pathways

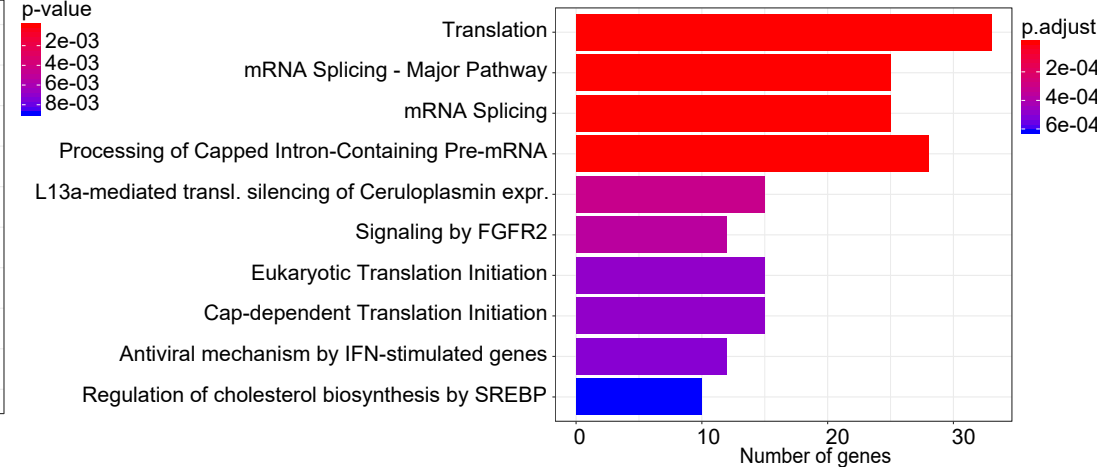

Supplement: s1 [file s1]
