# Supplementary figures and images for: Temporal Splicing Switches in Elements of the TNF-Pathway Identified by Computational Analysis of Transcriptome Data for Human Cell Lines
Source: MDPI journal article supplement (doi:10.3390/ijms20051182), 2019-03-08

A

LCL-HO

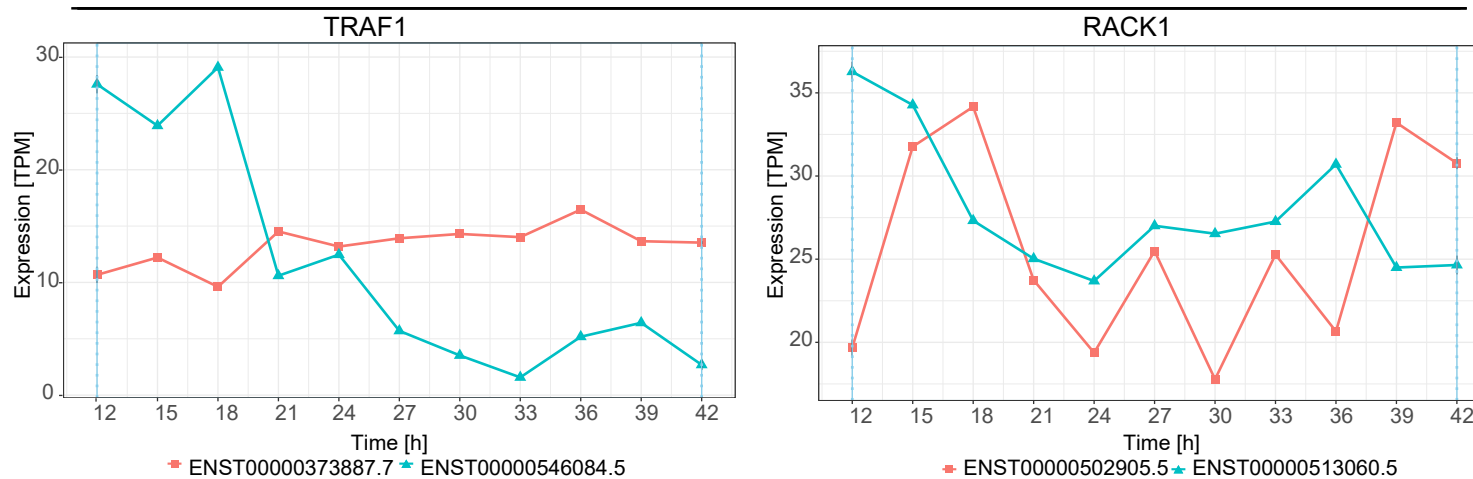

B

HD-MY-Z

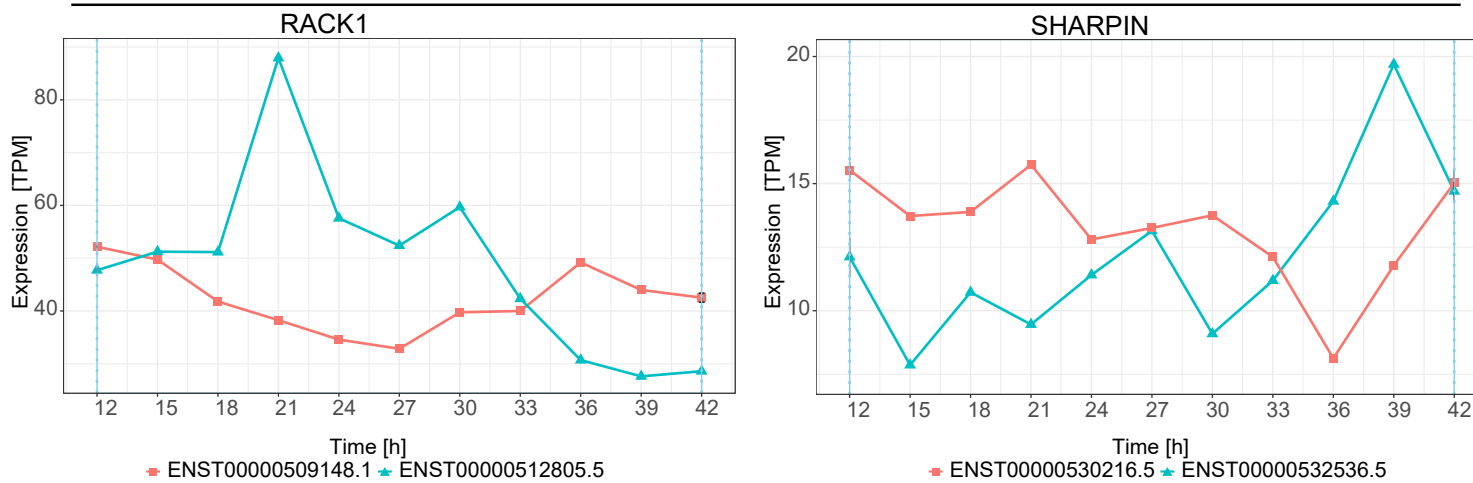

C

L-1236

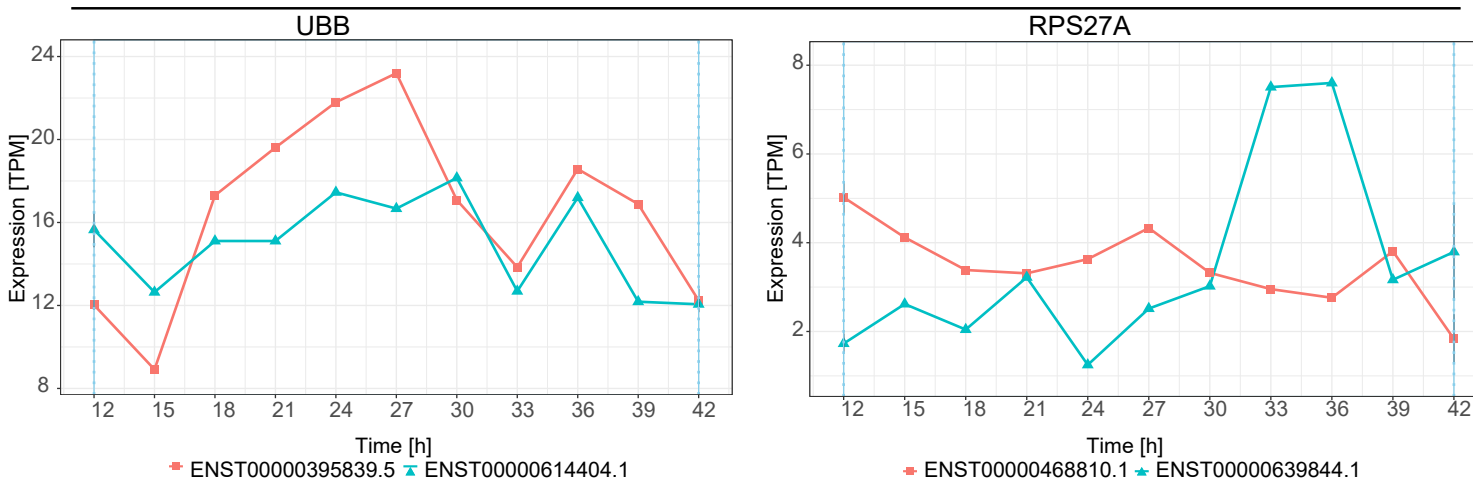

Supplement: s1 [file s1]

A

L-1236 STP1

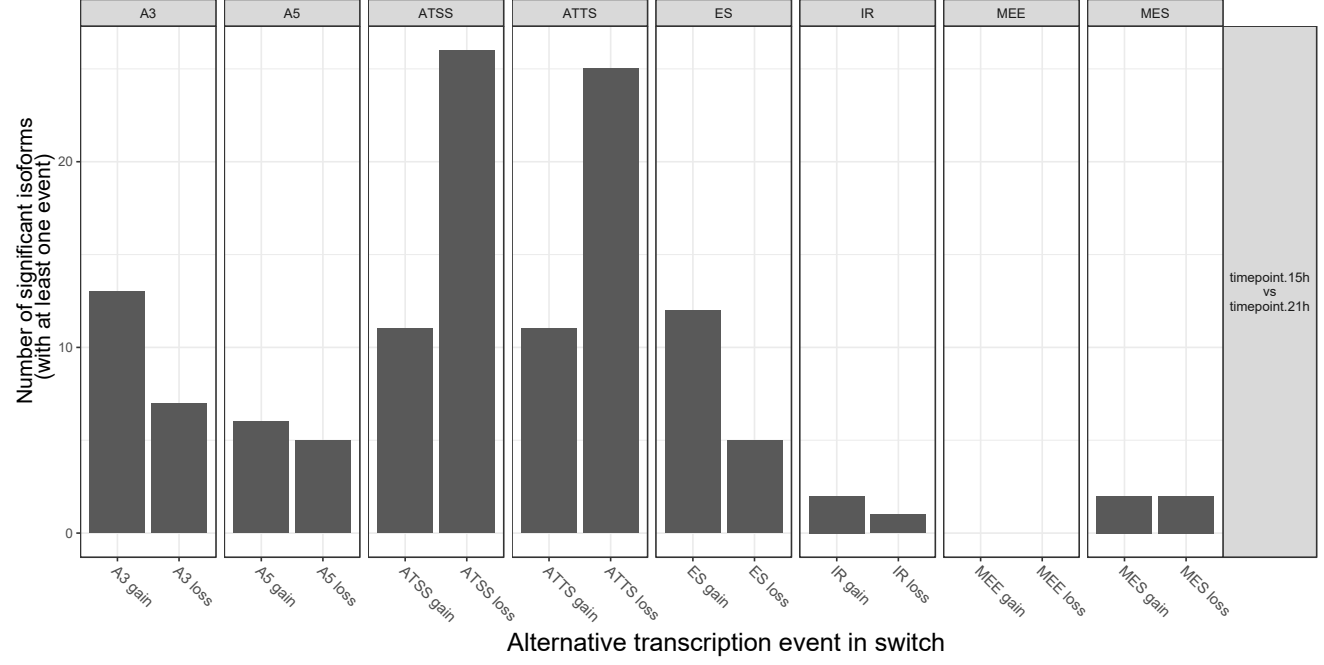

B

L-1236 STP2

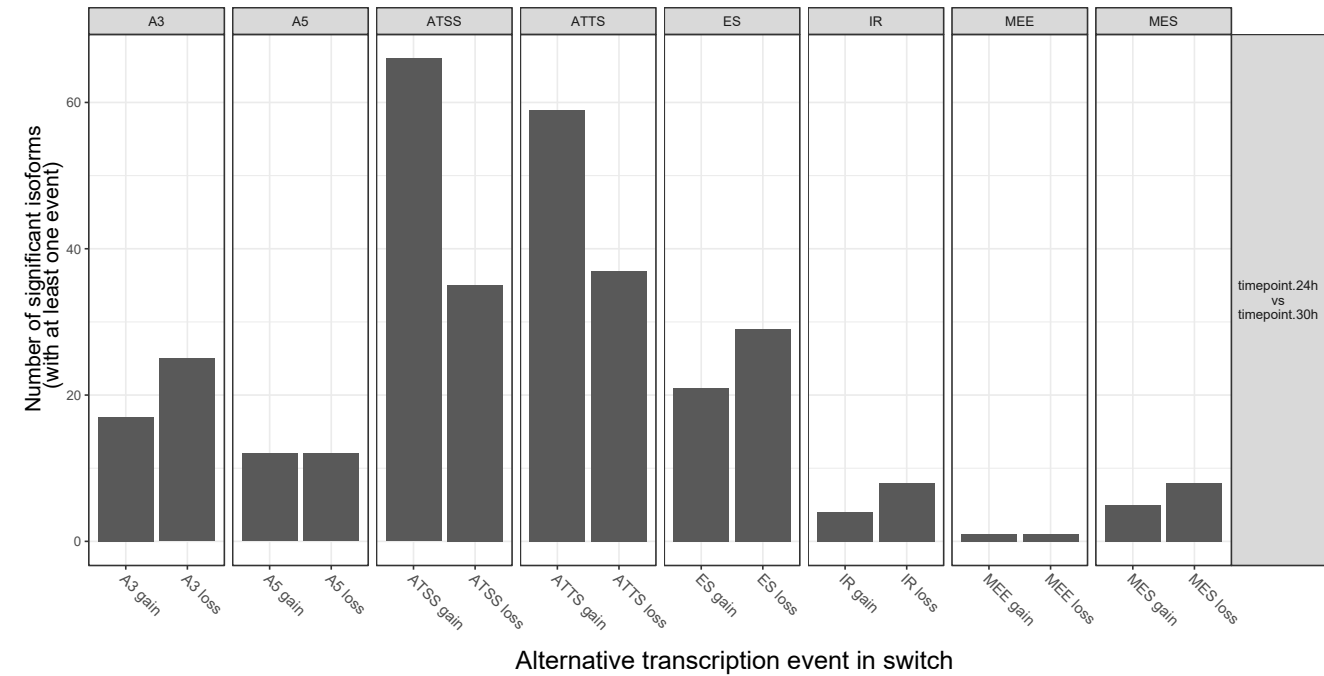

C

L-1236 STP3

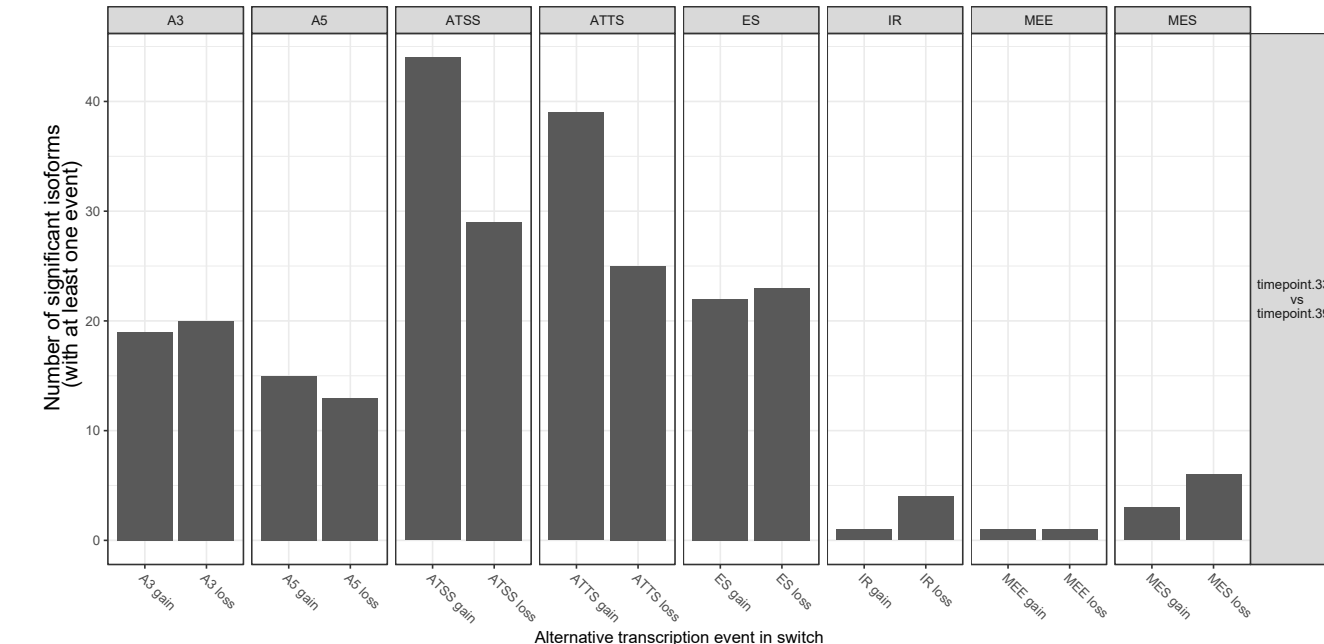

Supplement: s1 [file s1]

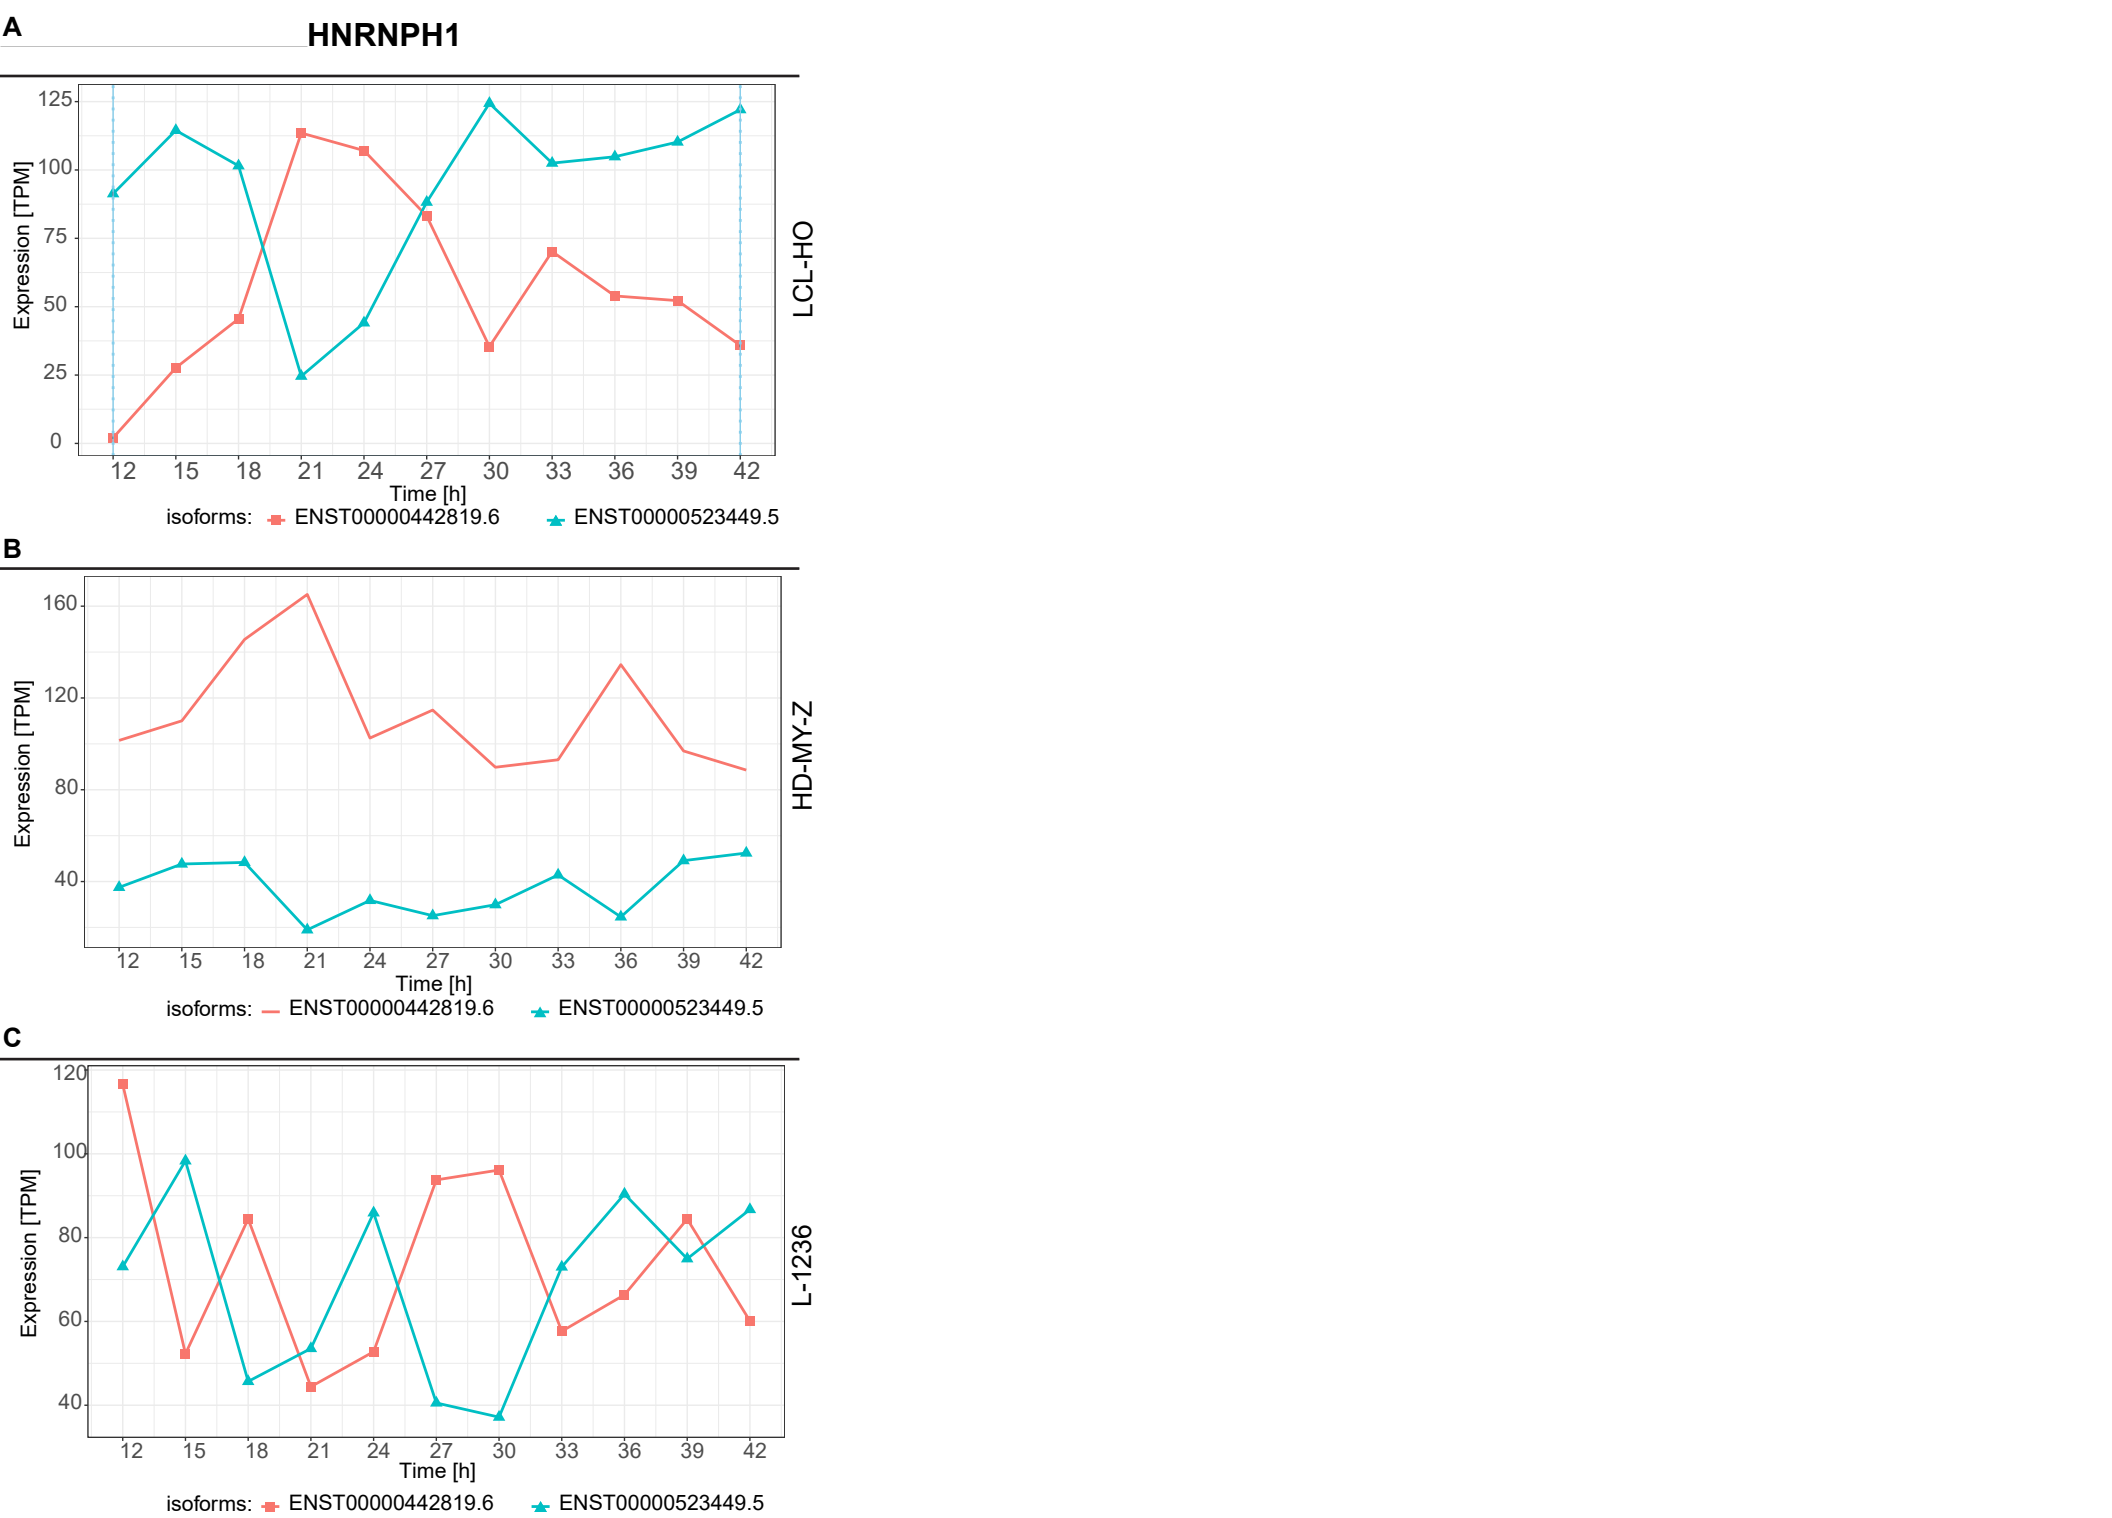

Supplement: s1 [file s1]

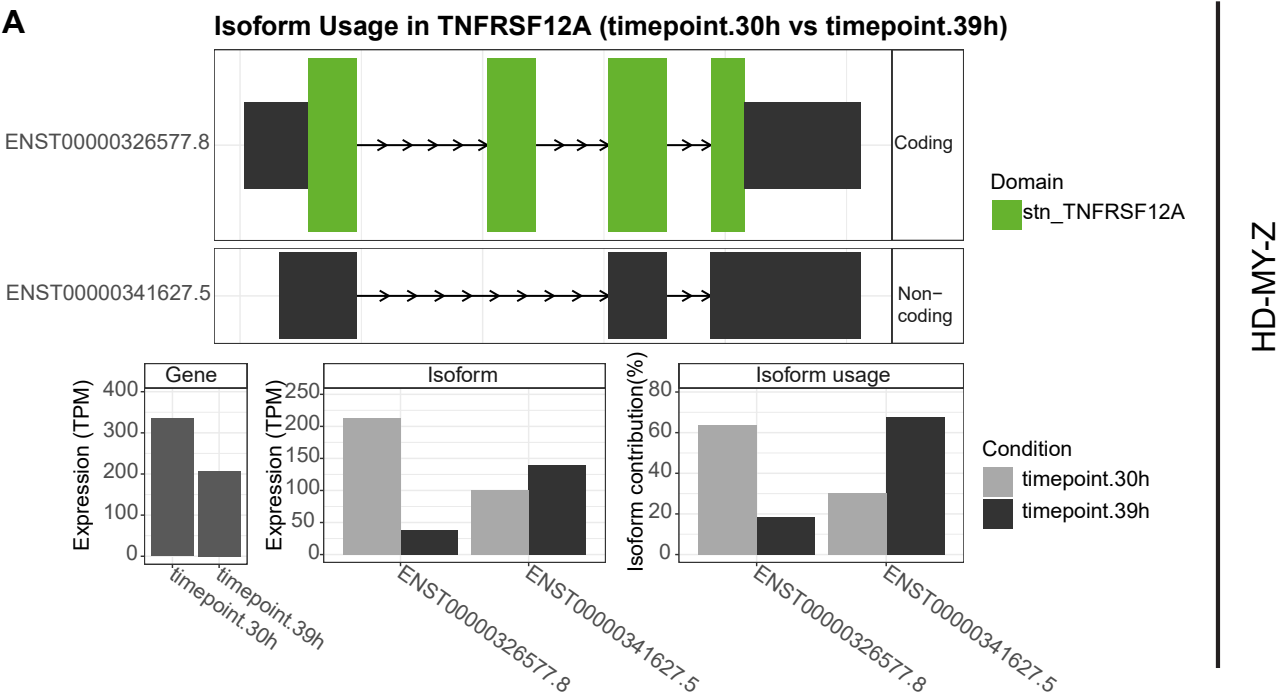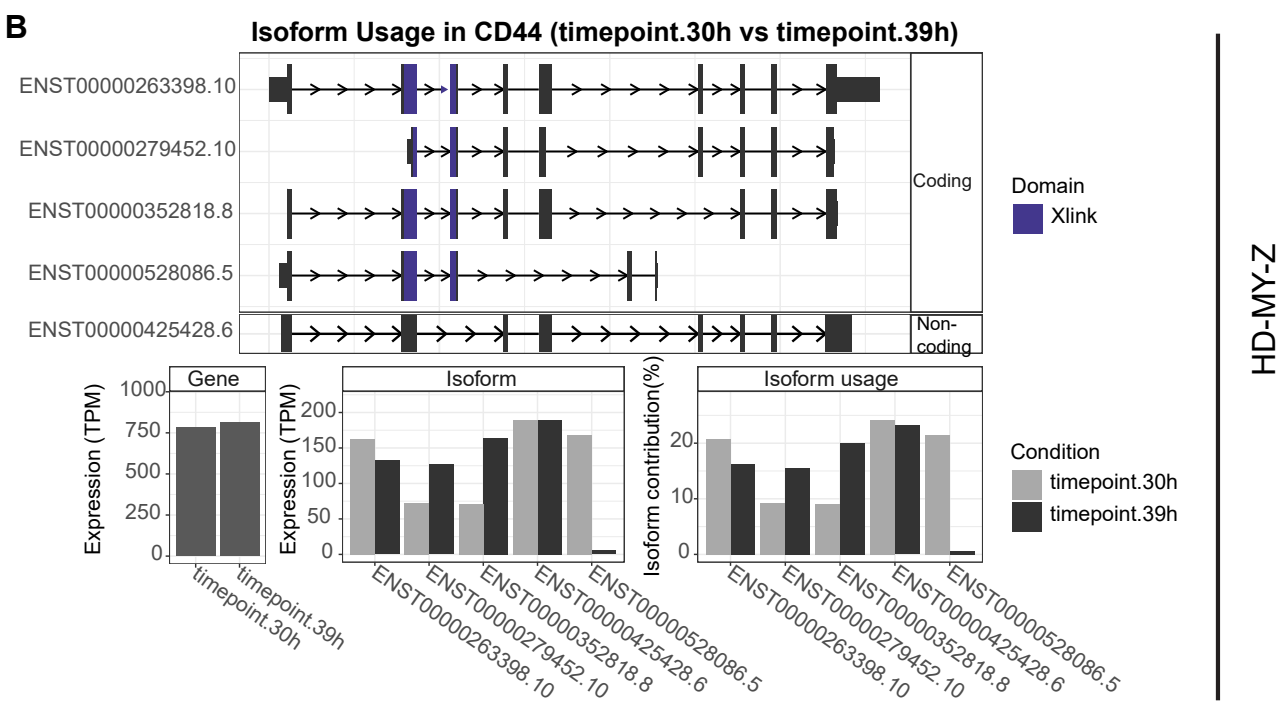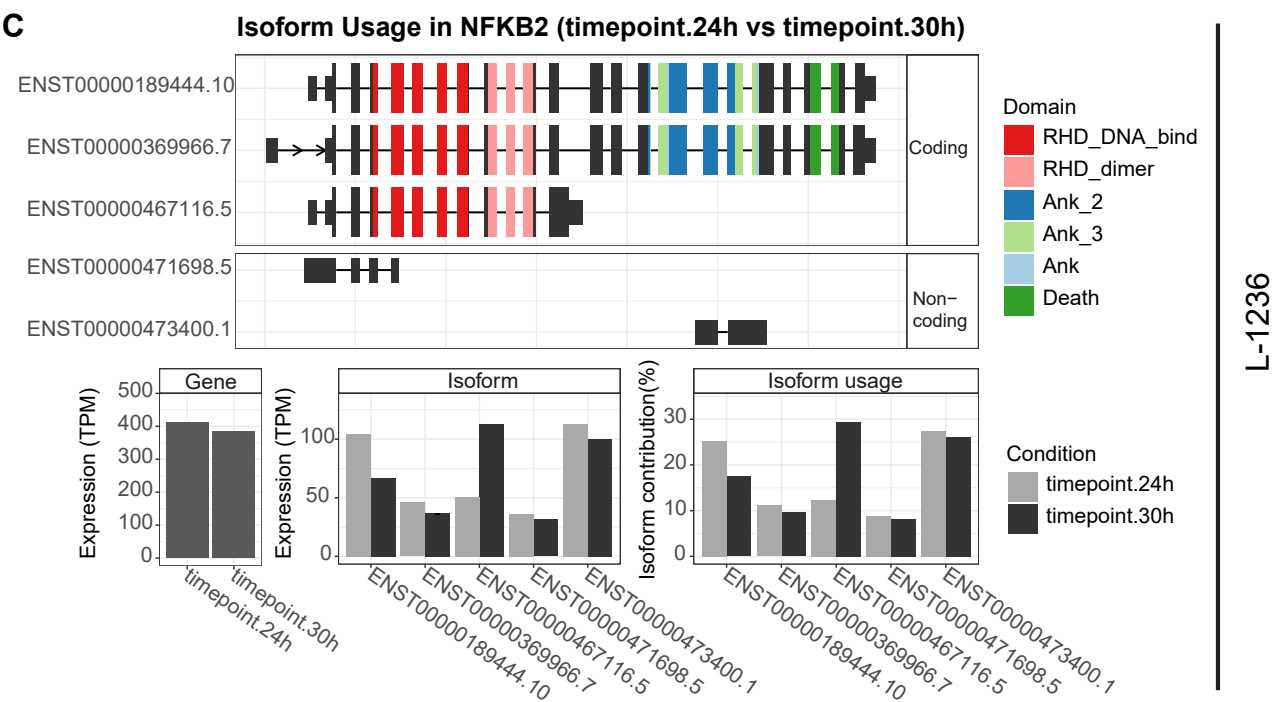

Supplement: s1 [file s1]

A

## LCL-HO, unique switching genes

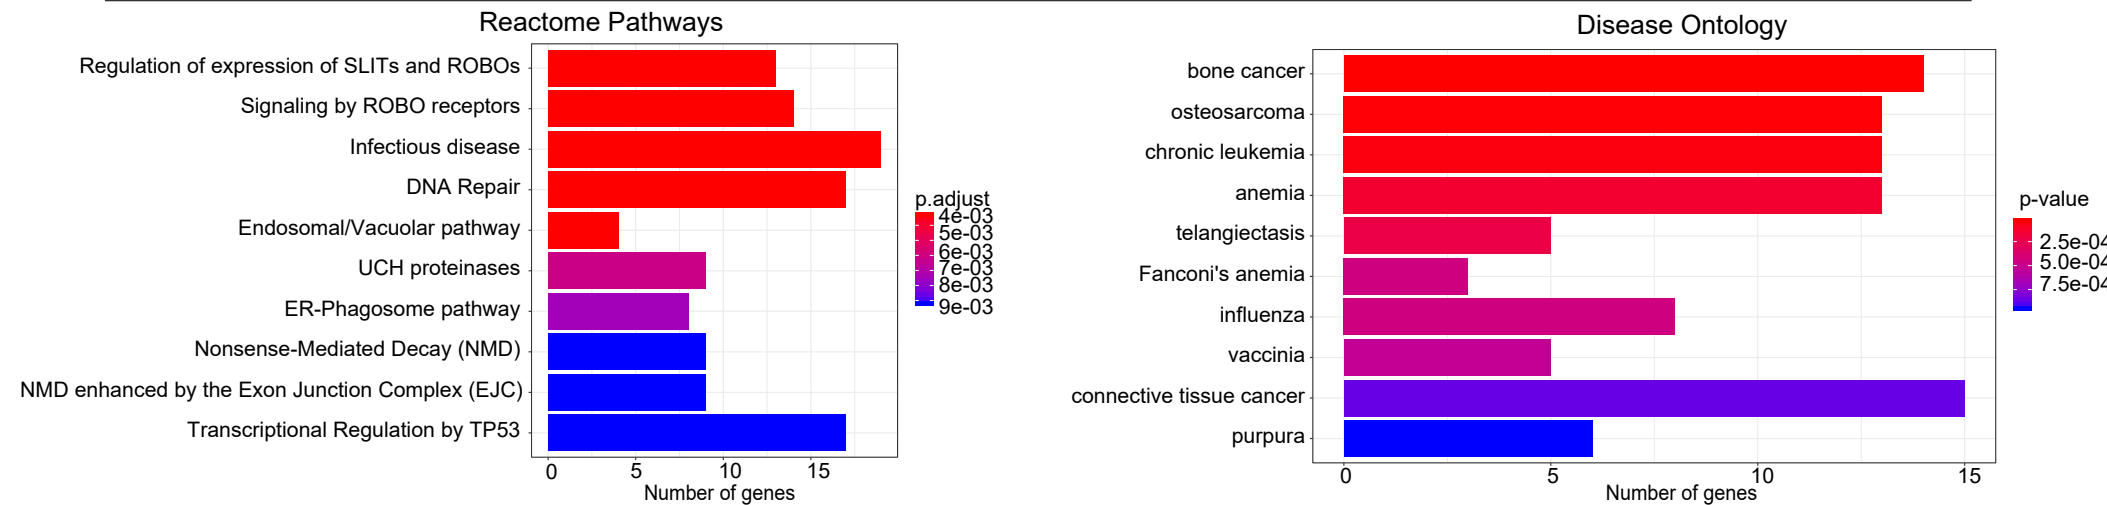

B

## HD-MY-Z, unique switching genes

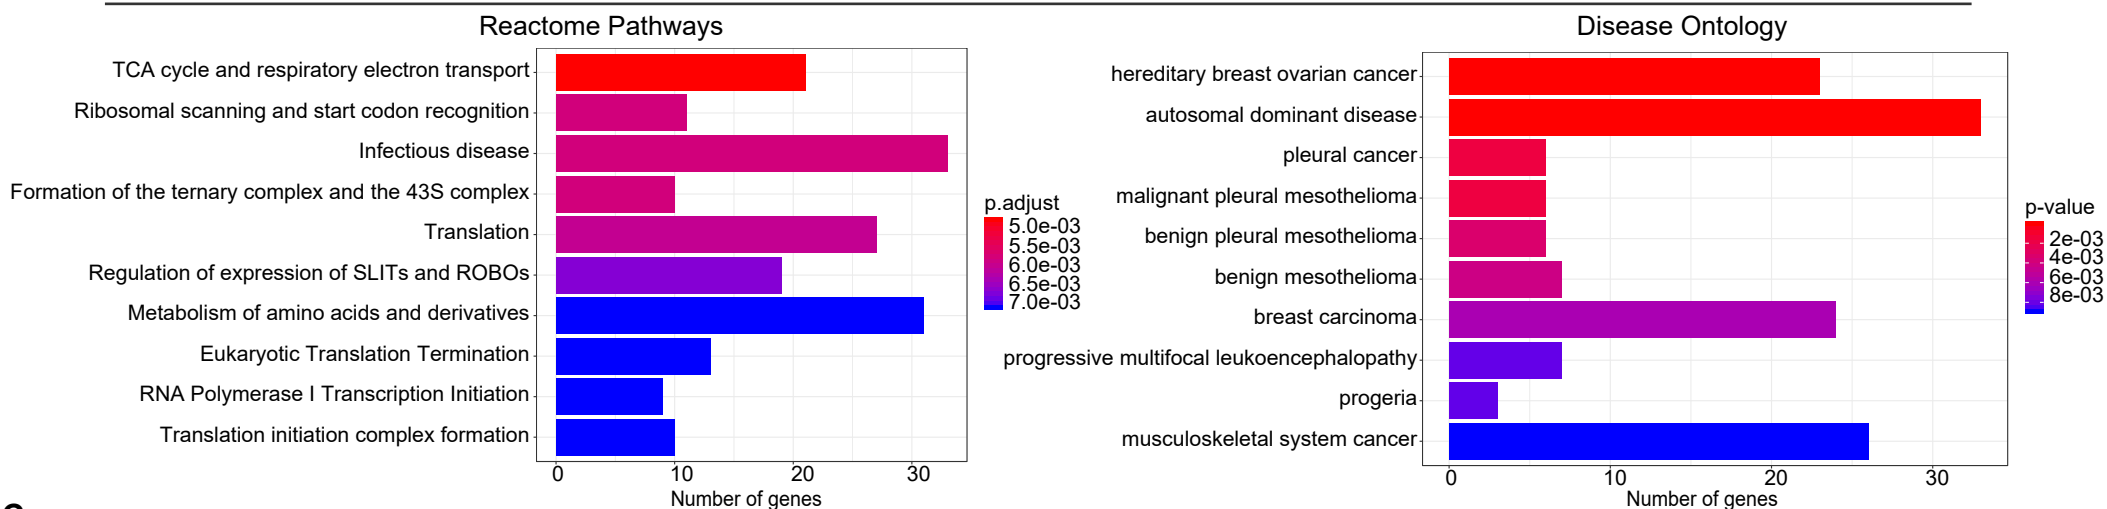

C

## L-1236, unique switching genes

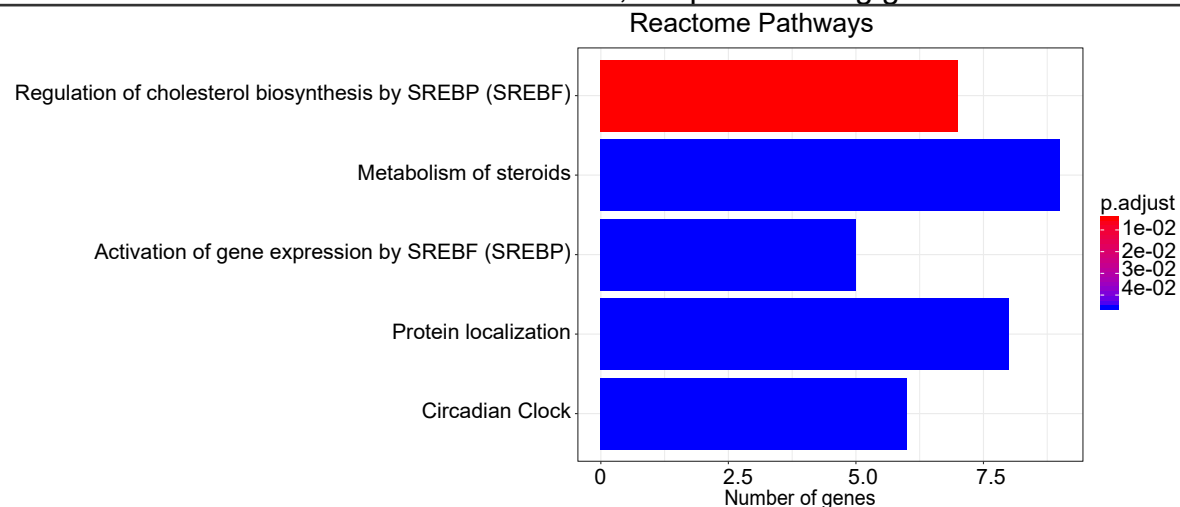

Supplement: s1 [file s1]

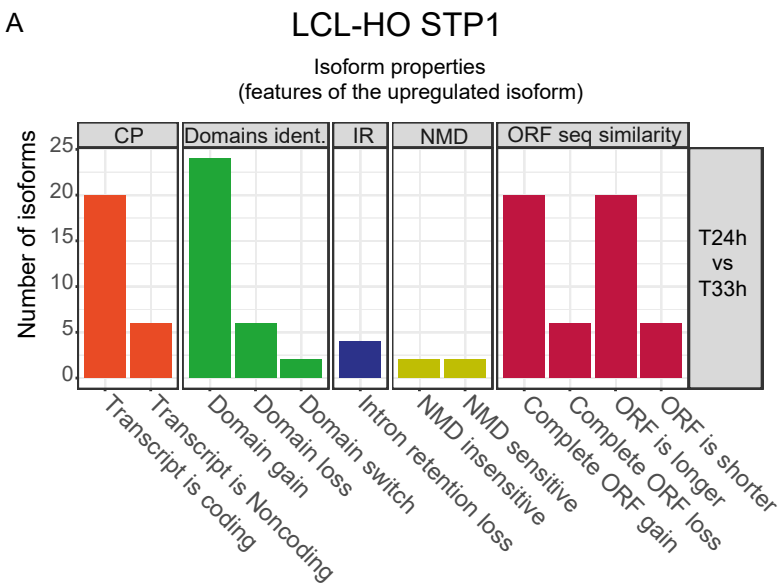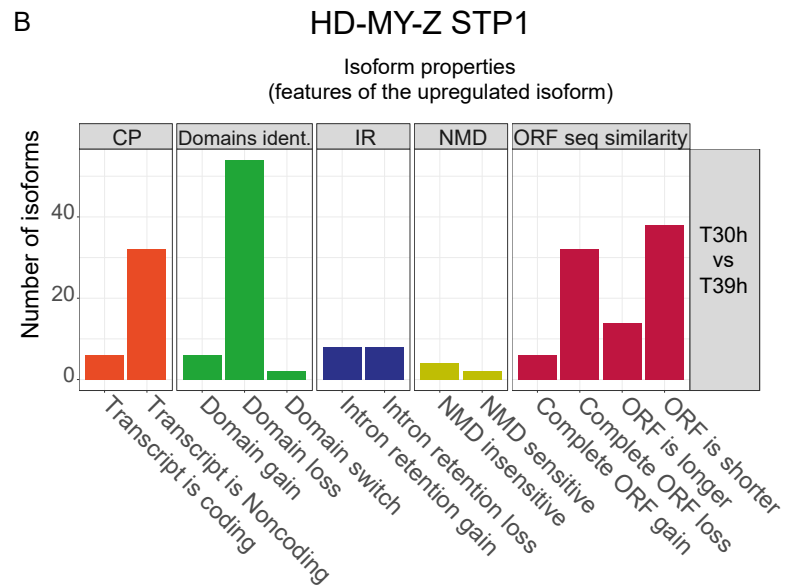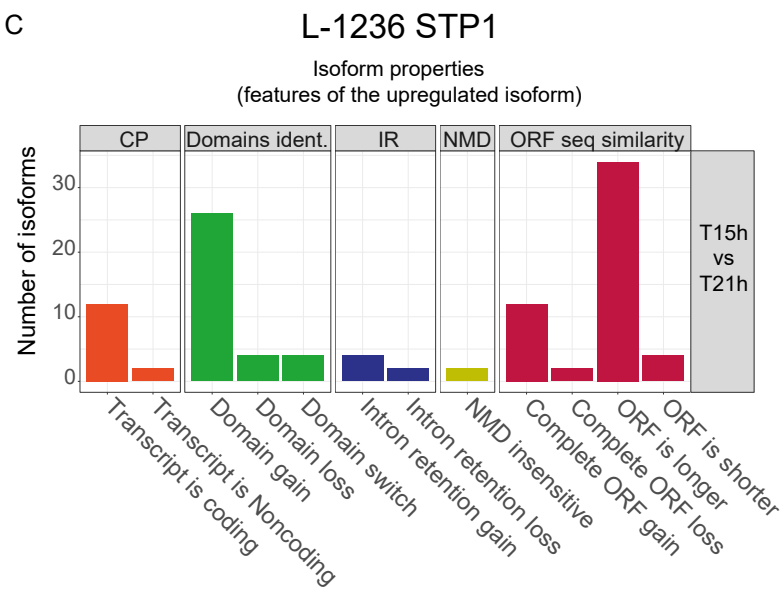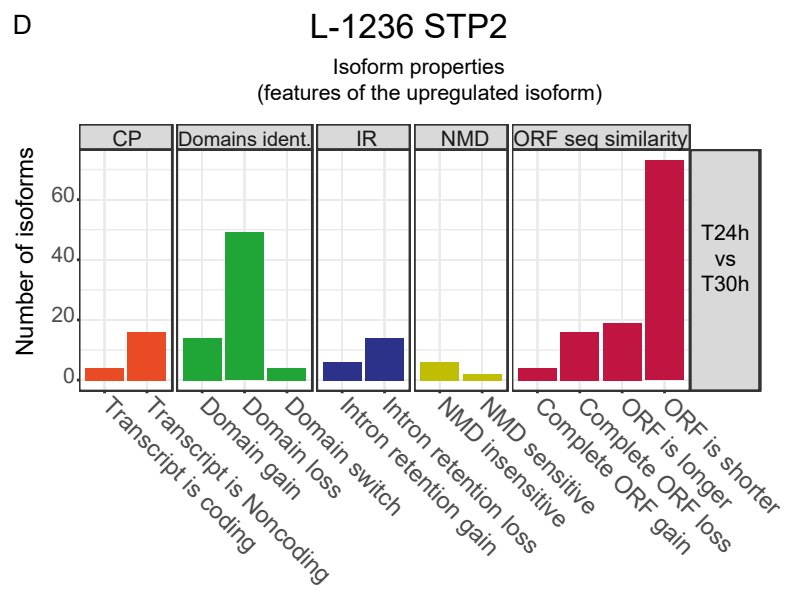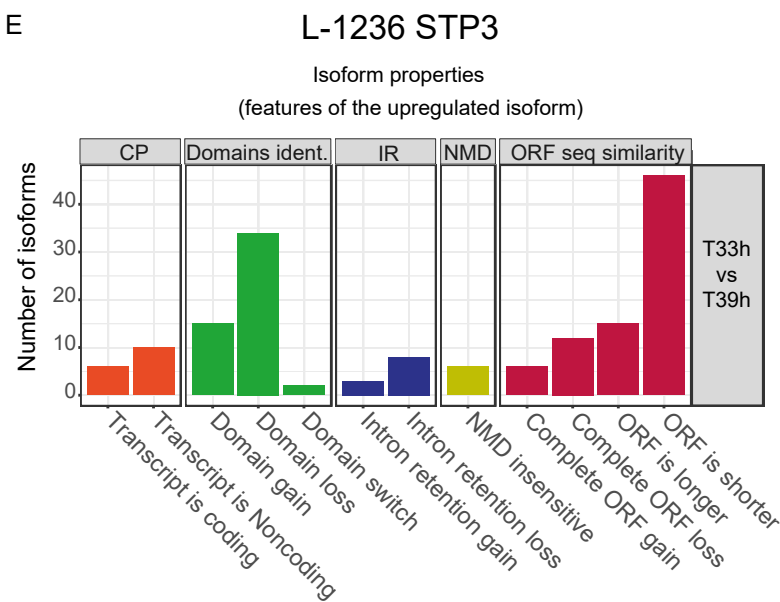

Supplement: s1 [file s1]

**A****LCL-HO**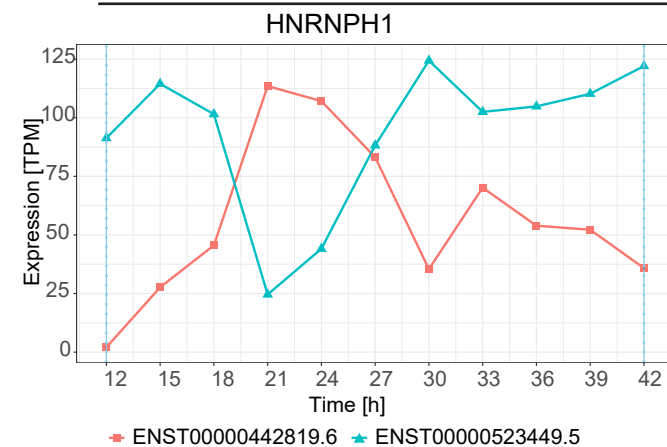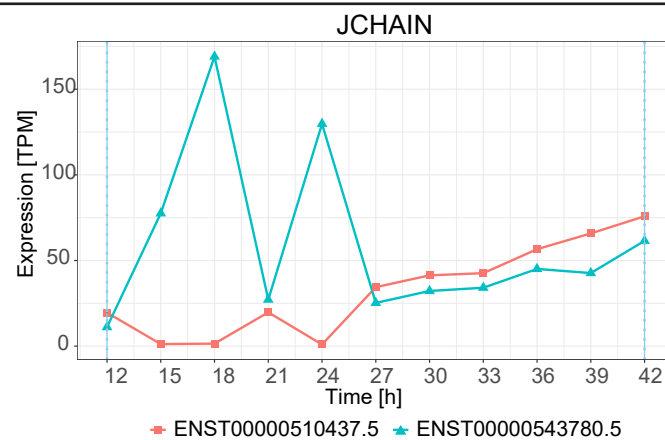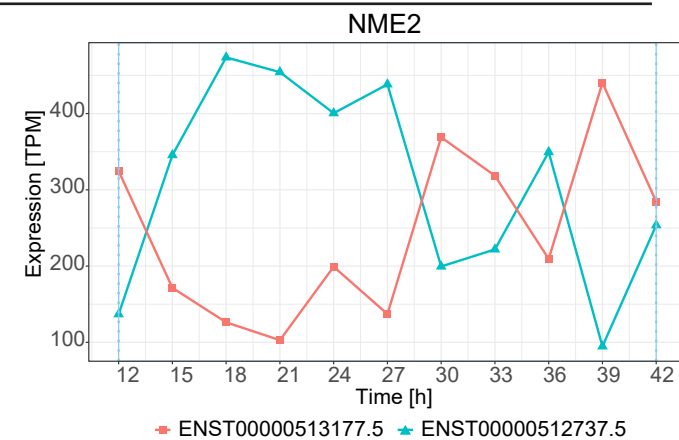**B****HD-MY-Z**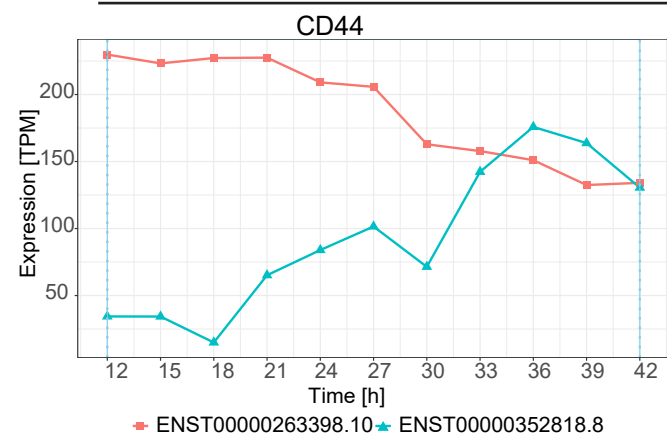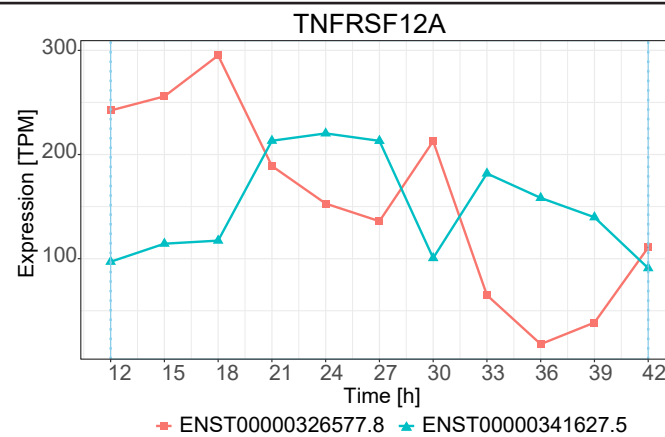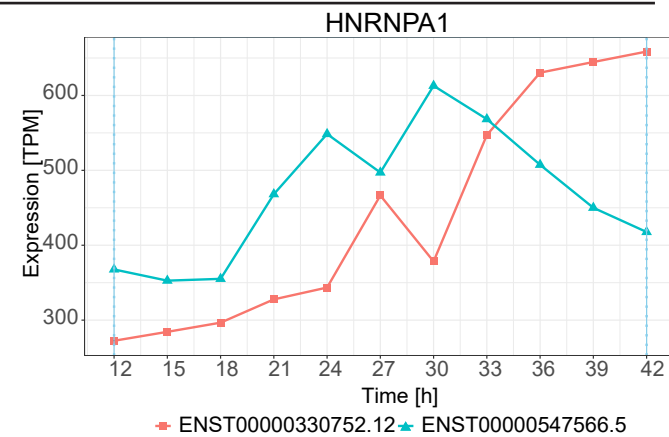**C****L-1236**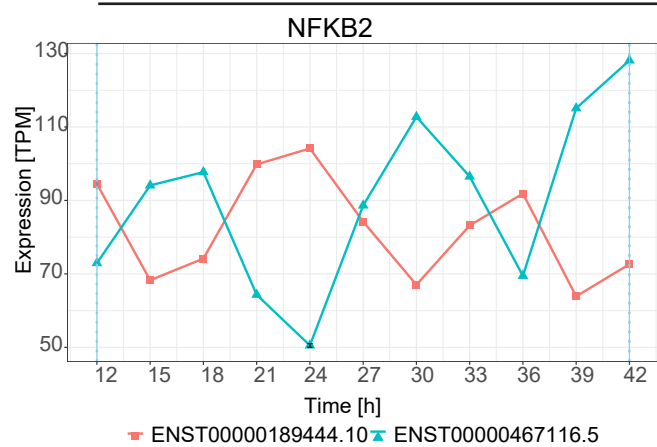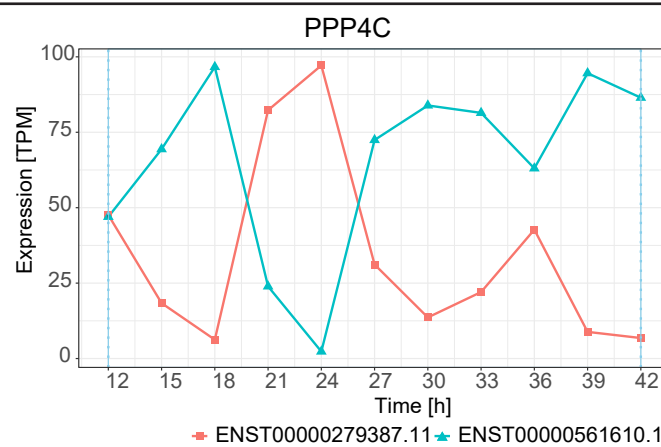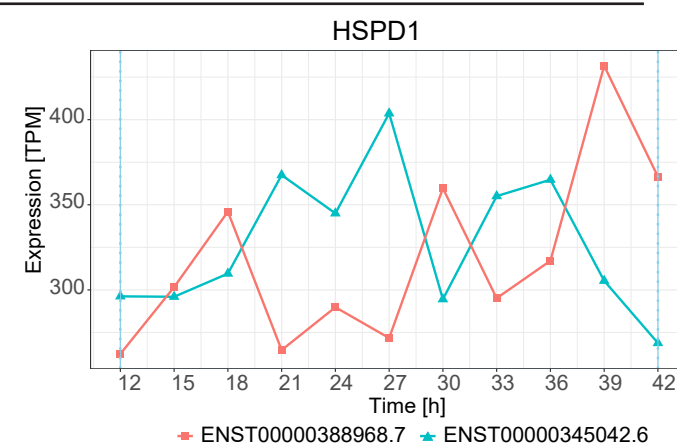

Supplement: s1 [file s1]

A

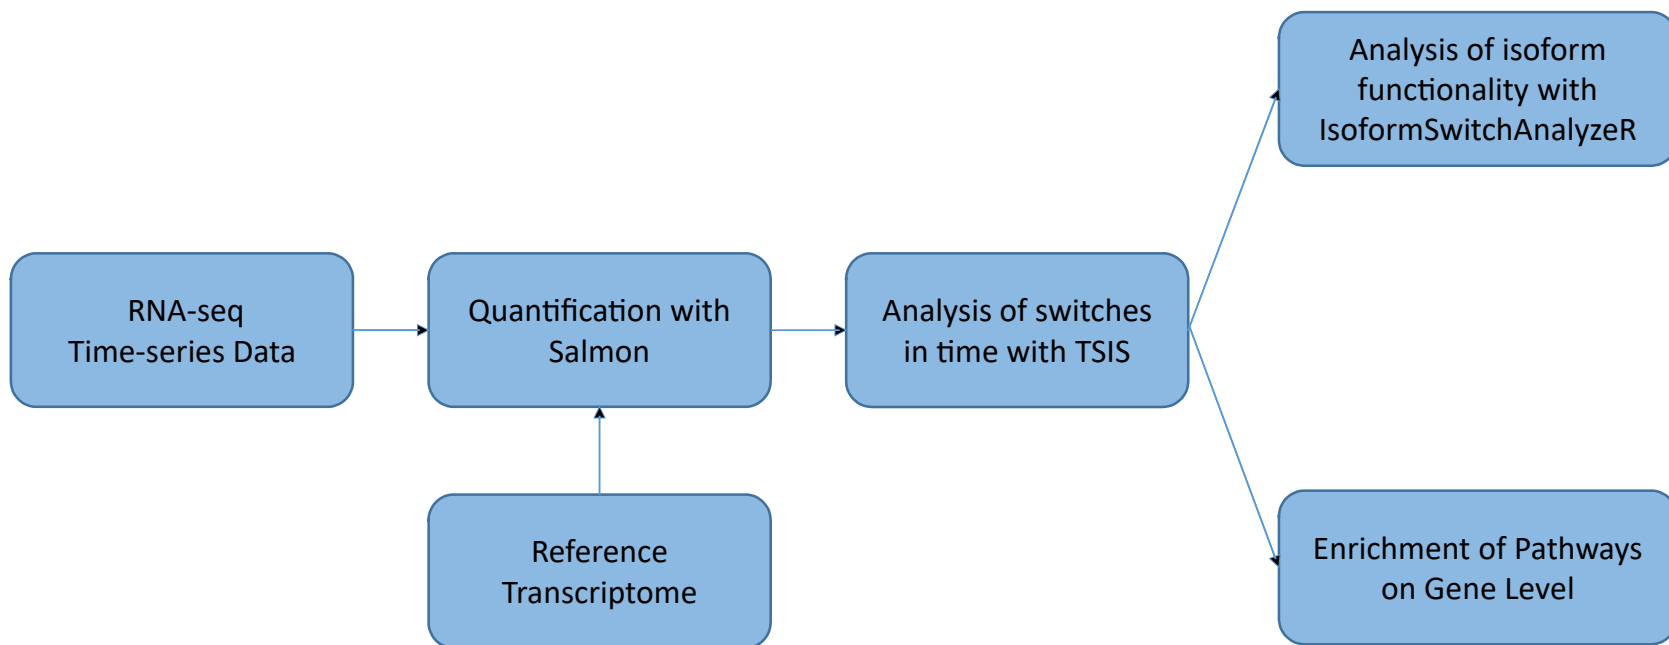

B

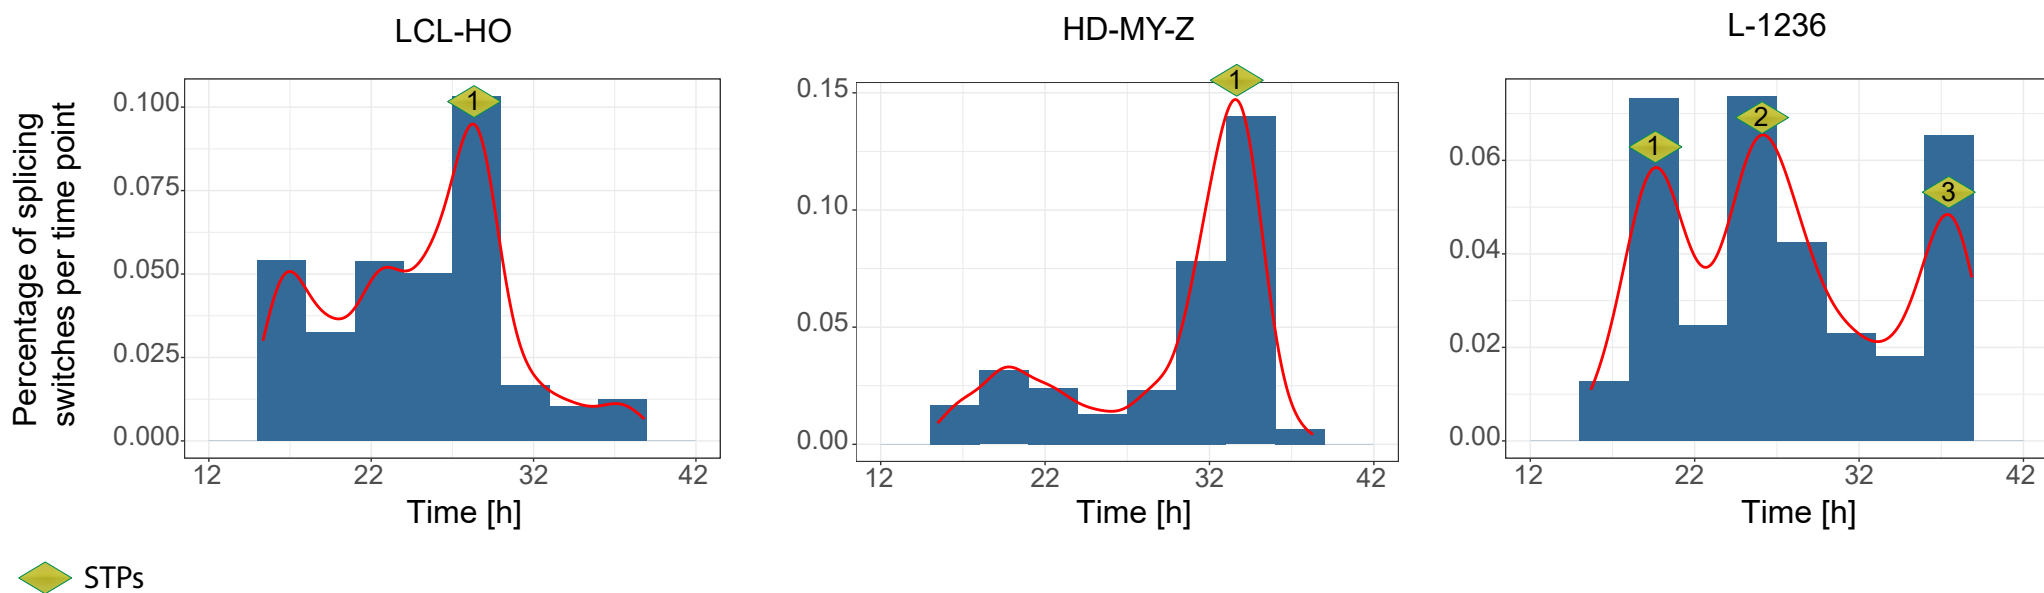

Supplement: s1 [file s1]

LCL-HO STP1

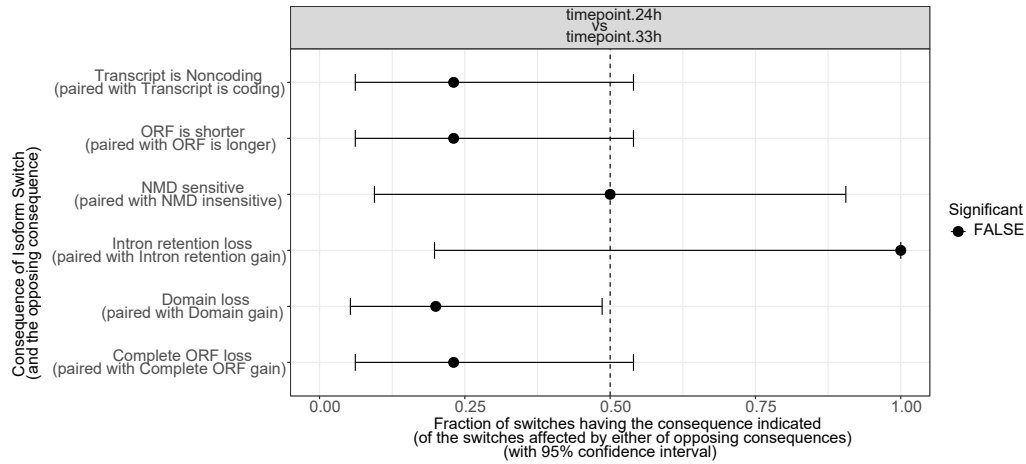

HD-MY-Z STP1

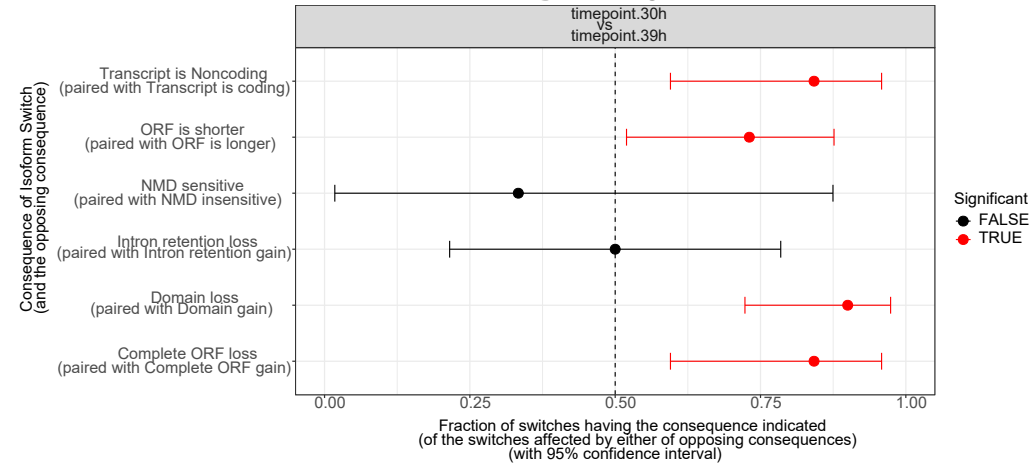

L-1236 STP1

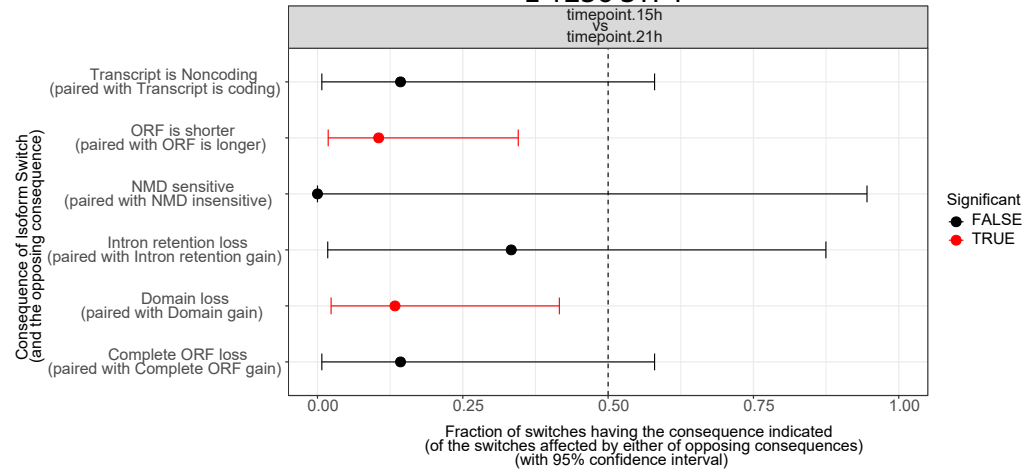

L-1236 STP2

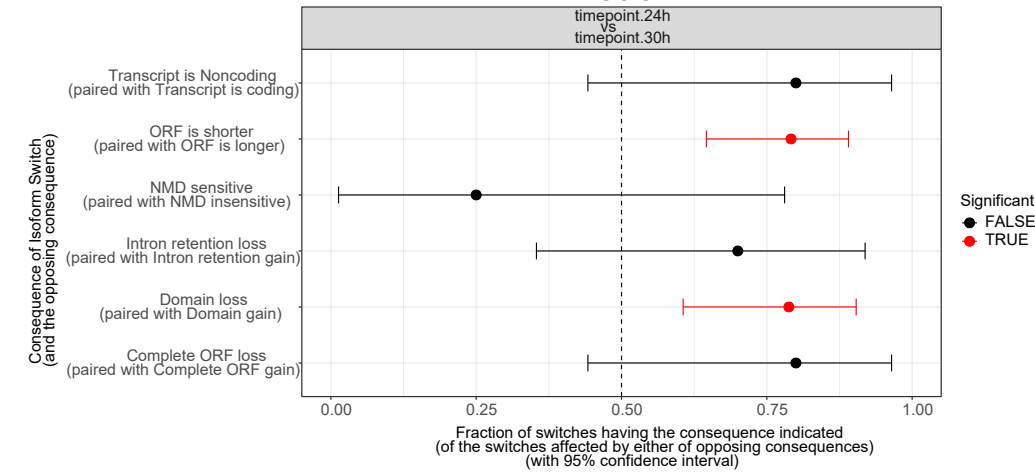

L-1236 STP3

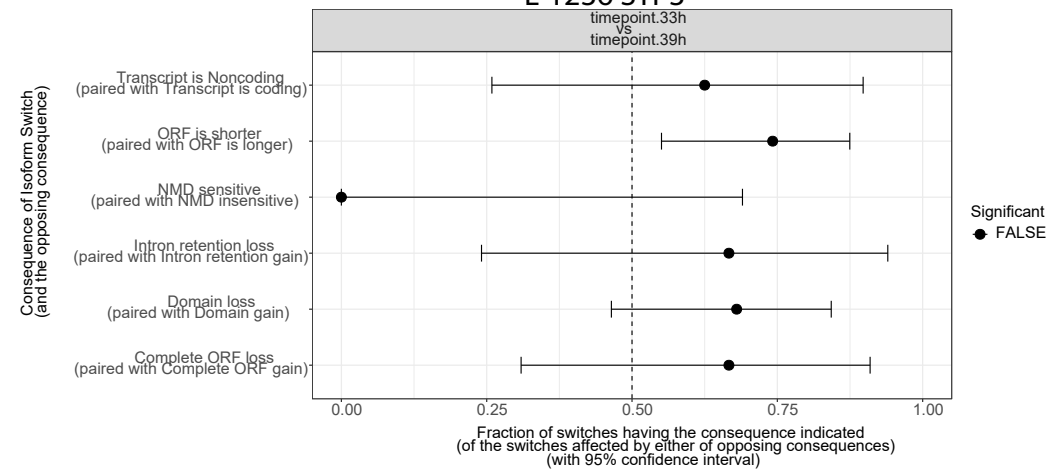

Supplement: s1 [file s1]

A

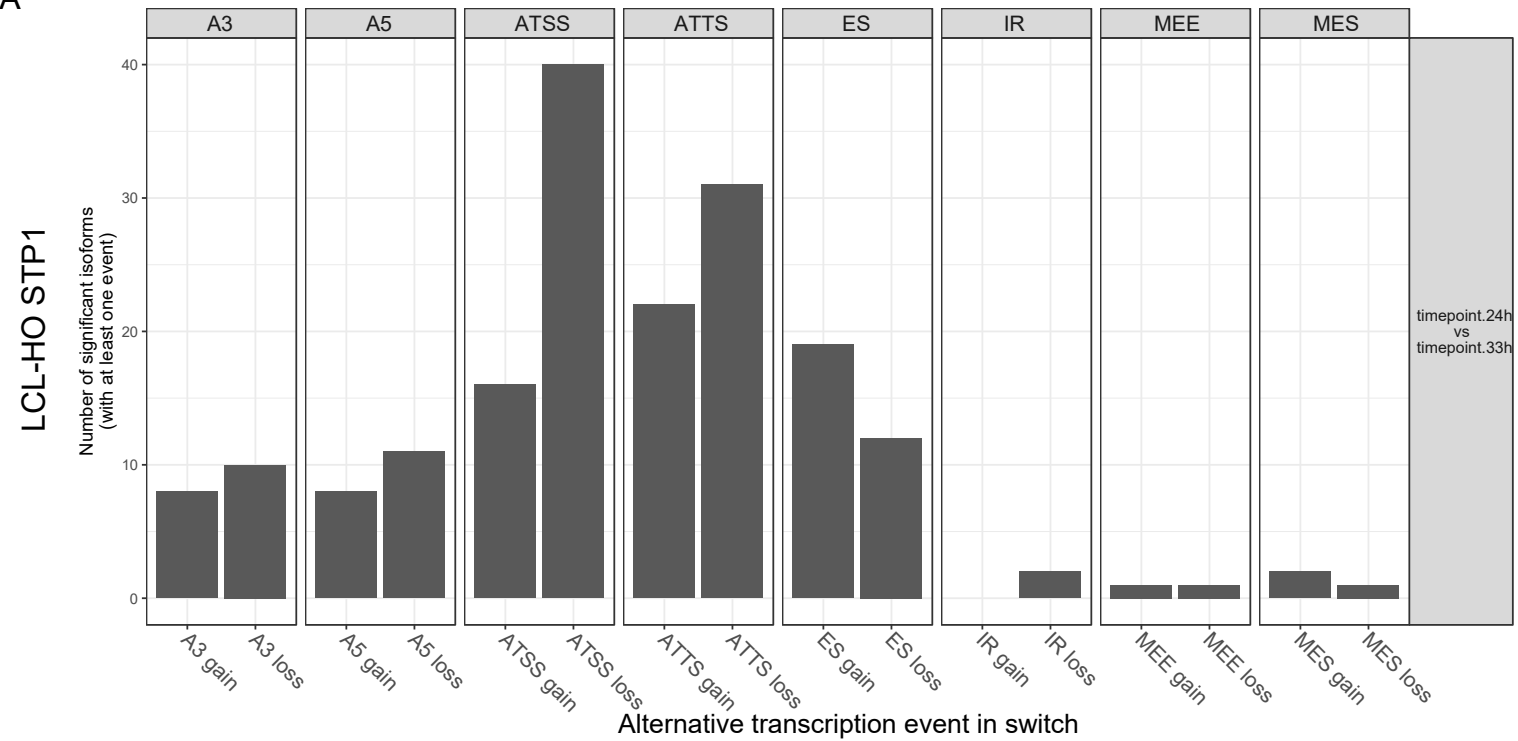

B

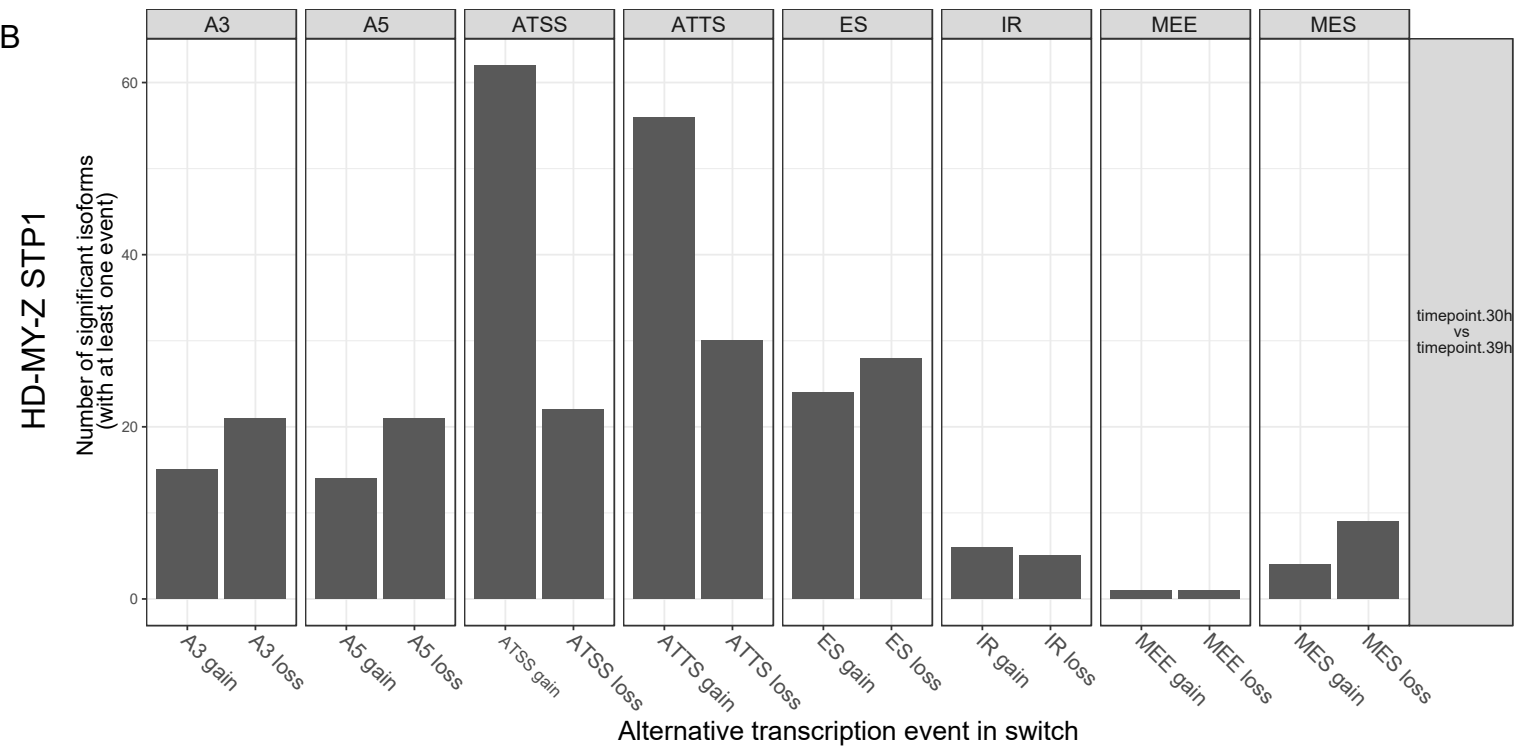

Supplement: s1 [file s1]
